# Supplementary material
Source: Elsevier journal article supplement (https://www.sciencedirect.com/science/article/pii/S0120334714001464)
Supplement: mmc1 [file S0120334714001464:mmc1.docx]

Anexo 1. Búsqueda sistemática de protocolos clínicos para Protocolos Clínicos de manejo de anestesia, pre, intra y Posoperatoria

Sexually Transmitted Infections Cochrane Review Group

School of Medicine

National University of Colombia

Ciudad Universitaria

Bogotá D.C.

**Metodología**

Se realizó una búsqueda sistemática, altamente sensible, con el objetivo de identificar Protocolos Clínicos sobre

**1)** Preparación del paciente para el acto quirúrgico que incluya traslado del paciente al quirofano

**2)** Manejo de complicaciones posquirúrgicas que incluya transporte de paciente complicado

**3)** Controles posquirúrgicos

Fuentes de información

De acuerdo con la especificidad temática de la búsqueda, se seleccionaron los siguientes recursos electrónicos como fuente de información:

1. Bases de datos de organismos compiladores de Protocolos

»**»** Hunter & New England Health Pathways

»**»** National Institute for Health and Clinical Excellence (NICE)

»**»** Worcestershire Treatment Pathways

»**»** Institute for Clinical Systems Improvement (ICSI)

**b)** Páginas electrónicas de sociedades de anestesia

»**»** American Society of Anesthesiologist https://www.asahq.org/

»**»** International Anesthesia Research Society (IARS) http://www.iars.org/

»**»** European Society of Anesthesiology (ESA) http://www.esahq.org/euroanaesthesia

»**»** World Federation of Societies of Anaesthesiologists (WFSA) http://www.wfsahq.org/

»**»** Japanese Society of Anesthesiologist http://www.anesth.or.jp/english/outline.html

»**»** The Scandinavian Society of Anaesthesiology and Intensive

Care Medicine (SSAI) <http://www.ssai.info/>

**c)** Bases de datos biomédicas

»**»** Medline

»**»** Embase

**d)** Motores de búsqueda genéricos

»**»** Google

»**»** Google Scholar

Diseño e implementación de las estrategias de búsqueda

En un primer paso se identificaron los términos clave de búsqueda (lenguaje natural), correspondientes a la condición de salud o área de interés (anestesia, cuidado perioperatorio y protocolos clínicos). Posteriormente, se construyó una estrategia de búsqueda de base, compuesta por vocabulario controlado (términos MeSH, EMTREE y DeCS) y lenguaje libre (variaciones ortográficas, plurales, sinónimos, acrónimos y abreviaturas).

A partir de la estrategia de base, se adaptaron estrategias de búsqueda para los diferentes recursos, empleando cuando fue posible, expansión de términos, identificadores de campo (título y resumen), truncadores y operadores booleanos y de proximidad.

Se realizaron búsquedas en los repositorios de protocolos clínicos, rastreando palabras clave mediante la herramienta “buscar” del navegador de internet, así como también una búsqueda reproducible en Google y Google Scholar. Las búsquedas se realizaron sin restricción de idioma, sin límite en la fecha de publicación.

Para cada búsqueda se generó una bitácora o reporte, garantizando su reproducibilidad y transparencia. El listado de referencias fue consolidado en una base de datos en Excel.

Las fuentes con resultados positivos están marcadas con color azul para una mejor identificación.

**Resultados**

A continuación, se presentan los reportes de búsqueda para cada fuente de información consultada.

| **Reporte de búsqueda núm.1** | |
| --- | --- |
| **Tipo de búsqueda** | Nueva |
| **Base de datos** | - Hunter & New England Health Pathways - http://hneproject.healthpathways.org.au/ |
| **Plataforma** | - |
| **Fecha de búsqueda** | 19/08/2014 |
| **Rango de fecha de búsqueda** | - Ninguna |
| **Restricciones de lenguaje** | Ninguna |
| **Otros límites** | Ninguno |
| **Estrategia de búsqueda** | 1. Preoperative 2. Postoperative |
| **Núm. de referencias identificadas** | 0 |

**Resultados verificables en:**

<http://hneproject.healthpathways.org.au/SearchResults.aspx?Search=preoperative>

<http://hneproject.healthpathways.org.au/SearchResults.aspx?Search=postperative>

| **Reporte de búsqueda núm. 2** | |
| --- | --- |
| **Tipo de búsqueda** | Nueva |
| **Base de datos** | - National Institute for Health and Clinical Excellence (NICE) - https://www.evidence.nhs.uk/ |
| **Plataforma** | - |
| **Fecha de búsqueda** | 24/08/2014 |
| **Rango de fecha de búsqueda** | - Ninguna |
| **Restricciones de lenguaje** | Ninguna |
| **Otros límites** | Types of information: Care Pathways |
| **Estrategia de búsqueda** | Protocolo 1. Preoperative  Protocolo 2. Postoperative complications  Protocolo 3. Postoperative care OR postoperative period |
| **núm. de referencias identificadas** | 1. 7  2. 7  3. 8 |

**Resultados disponibles siguiendo los siguientes enlaces**:

- Para el protocolo 1:

<https://www.evidence.nhs.uk/search?q=preoperative&om=%5B%7B%22itn%22%3A%5B%22%20care%20pathways%20%22%5D%7D%5D>

- Para el protocolo 2:

<https://www.evidence.nhs.uk/search?q=Postoperative%20complications&om=%5B%7B%22itn%22%3A%5B%22%20care%20pathways%20%22%5D%7D%5D>

- Para el protocolo 3:

<https://www.evidence.nhs.uk/search?q=Postoperative%20care%20OR%20postoperative%20period&om=%5B%7B%22itn%22%3A%5B%22%20care%20pathways%20%22%5D%7D%5D>

| **Reporte de búsqueda núm.3** | |
| --- | --- |
| **Tipo de búsqueda** | Nueva |
| **Base de datos** | - Worcestershire Treatment Pathways - <http://www.wkp.nhs.uk/carepathways/> |
| **Plataforma** | - |
| **Fecha de búsqueda** | 19/08/2014 |
| **Rango de fecha de búsqueda** | - Ninguna |
| **Restricciones de lenguaje** | Ninguna |
| **Otros límites** | Ninguno |
| **Estrategia de búsqueda** | Búsqueda manual |
| **Núm. de referencias identificadas** | 0 |

**Resultados verificables en:**

[**http://www.wkp.nhs.uk/carepathways/**](http://www.wkp.nhs.uk/carepathways/)

| **Reporte de búsqueda núm.4** | |
| --- | --- |
| **Tipo de búsqueda** | Nueva |
| **Base de datos** | - Institute for Clinical Systems Improvement (ICSI) - <https://www.icsi.org/guidelines__more/search_-_keyword/> |
| **Plataforma** | - |
| **Fecha de búsqueda** | 19/08/2013 |
| **Rango de fecha de búsqueda** | - Ninguna |
| **Restricciones de lenguaje** | Ninguna |
| **Otros límites** | Ninguno |
| **Estrategia de búsqueda** | Protocolo 1. Preoperative  Protocolo 2. Postoperative  Protocolo 3. Postoperative |
| **Núm. de referencias identificadas** | 1. 3  2. 1  3. 1 |

**Resultados disponibles siguiendo los siguientes enlaces:**

- Para el protocolo 1:

<https://www.icsi.org/guidelines__more/search_results__keyword/?catalog_search_panel_query=1&catalog_search_panel_query_text=preoperative#results_header>

- Para el protocolo 2:

<https://www.icsi.org/guidelines__more/search_results_-_keyword/?catalog_search_panel_query=1&catalog_search_panel_query_text=postoperative#results_header>

- Para el protocolo 3:

<https://www.icsi.org/guidelines__more/search_results_-_keyword/?catalog_search_panel_query=1&catalog_search_panel_query_text=postoperative#results_header>

| **Reporte de búsqueda núm.5** | |
| --- | --- |
| **Tipo de búsqueda** | Nueva |
| **Base de datos** | - American Society of Anesthesiologist - https://www.asahq.org/ |
| **Plataforma** | - |
| **Fecha de búsqueda** | 24/08/2013 |
| **Rango de fecha de búsqueda** | - Ninguna |
| **Restricciones de lenguaje** | Ninguna |
| **Otros límites** | Ninguno |
| **Estrategia de búsqueda** | Protocolo 1. Preoperative AND (protocol OR pathway)  Protocolo 2. Postoperative complication AND (protocol OR pathway)  Protocolo 3. Postoperative AND (protocol OR pathway) |
| **núm. de referencias identificadas** | Protocolo 1: 2078  Protocolo 2: 1883  Protocolo 3: 3300 |

**Resultados disponibles siguiendo los siguientes enlaces:**

- Para el protocolo 1:

<https://www.asahq.org/coveo.aspx?q=properative#s=~_d0!2!1!!1!7!0!1!!2!!!1!0!2!_d2!preoperative+AND+%28protocol+OR+pathway%29!SA+Pacific+Standard+Time!127!_d6!BpzptpypAptpvqaqwrusrxrqqpvqqqpsp!_d0!4!_d8!_d1!3!!xqbqtDpupwpEppvpupvpwppHpppGpFpypupApzpBppCpqxprpqsq>!

- Para el protocolo 2:

<https://www.asahq.org/coveo.aspx?q=%28postoperative%20complication%29%20AND%20%28protocol%20OR%20pathway%29>

- Para el protocolo 3:

<https://www.asahq.org/coveo.aspx?q=Postoperative%20AND%20%28protocol%20OR%20pathway%29>

| **Reporte de búsqueda núm.6** | |
| --- | --- |
| **Tipo de búsqueda** | Nueva |
| **Base de datos** | International Anesthesia Research Society (IARS) <http://www.iars.org/> |
| **Plataforma** | - |
| **Fecha de búsqueda** | 24/08/2013 |
| **Rango de fecha de búsqueda** | - Ninguna |
| **Restricciones de lenguaje** | Ninguna |
| **Otros límites** | Ninguno |
| **Estrategia de búsqueda** | Protocolo 1. Preoperative AND (protocol OR pathway)  Protocolo 2. Postoperative complication AND (protocol OR pathway)  Protocolo 3. Postoperative AND (protocol OR pathway) |
| **Núm. de referencias identificadas** | Protocolo 1: 1  Protocolo 2: 1  Protocolo 3: 1 |

**Resultados disponibles siguiendo los siguientes enlaces:**

- Para el protocolo 1:

<http://www.iars.org/search/?Keyword=preoperative%20AND%20%28protocol%20OR%20pathway%29>

- Para el protocolo 2:

<http://www.iars.org/search/?Keyword=Postoperative%20complication%20AND%20%28protocol%20OR%20pathway%29>

- Para el protoclo 3:

<http://www.iars.org/search/?Keyword=Postoperative%20AND%20%28protocol%20OR%20pathway%29>

| **Reporte de búsqueda núm.7** | |
| --- | --- |
| **Tipo de búsqueda** | Nueva |
| **Base de datos** | European Society of Anesthesiology (ESA) <http://www.esahq.org/euroanaesthesia> |
| **Plataforma** | - |
| **Fecha de búsqueda** | 24/08/2013 |
| **Rango de fecha de búsqueda** | - Ninguna |
| **Restricciones de lenguaje** | Ninguna |
| **Otros límites** | Ninguno |
| **Estrategia de búsqueda** | Búsqueda manual |
| **Núm. de referencias identificadas** | Cero |

**Resultados verificables en:**

[**http://www.esahq.org/resources/other-resources/guidelines**](http://www.esahq.org/resources/other-resources/guidelines)

| **Reporte de búsqueda núm.8** | |
| --- | --- |
| **Tipo de búsqueda** | Nueva |
| **Base de datos** | World Federation of Societies of Anaesthesiologists (WFSA) <http://www.wfsahq.org/> |
| **Plataforma** | - |
| **Fecha de búsqueda** | 24/08/2013 |
| **Rango de fecha de búsqueda** | - Ninguna |
| **Restricciones de lenguaje** | Ninguna |
| **Otros límites** | Ninguno |
| **Estrategia de búsqueda** | Búsqueda manual |
| **Núm. de referencias identificadas** | Cero |

**Resultados verificables en:**

[**http://www.wfsahq.org/our-work/safety-quality**](http://www.wfsahq.org/our-work/safety-quality)

| **Reporte de búsqueda núm.8** | |
| --- | --- |
| **Tipo de búsqueda** | Nueva |
| **Base de datos** | Japanese Society of Anesthesiologist <http://www.anesth.or.jp/english/outline.html> |
| **Plataforma** | - |
| **Fecha de búsqueda** | 24/08/2013 |
| **Rango de fecha de búsqueda** | - Ninguna |
| **Restricciones de lenguaje** | Ninguna |
| **Otros límites** | Ninguno |
| **Estrategia de búsqueda** | Búsqueda manual |
| **Núm. de referencias identificadas** | Cero |

**Resultados verificables en:**

[**http://www.anesth.or.jp/english/international.html**](http://www.anesth.or.jp/english/international.html)

| **Reporte de búsqueda núm.9** | |
| --- | --- |
| **Tipo de búsqueda** | Nueva |
| **Base de datos** | The Scandinavian Society of Anaesthesiology and Intensive Care Medicine (SSAI) <http://www.ssai.info/> |
| **Plataforma** | - |
| **Fecha de búsqueda** | 24/08/2013 |
| **Rango de fecha de búsqueda** | - Ninguna |
| **Restricciones de lenguaje** | Ninguna |
| **Otros límites** | Ninguno |
| **Estrategia de búsqueda** | Búsqueda manual |
| **Núm. de referencias identificadas** | Cero |

**Resultados verificables en:**

<http://www.ssai.info/guidelines/>

| **Reporte de búsqueda núm.10** | |
| --- | --- |
| **Tipo de búsqueda** | Nueva |
| **Base de datos** | - Medline - Embase |
| **Plataforma** | Embase.com |
| **Fecha de búsqueda** | 19/08/2013 |
| **Rango de fecha de búsqueda** | - Ninguna |
| **Restricciones de lenguaje** | Ninguna |
| **Otros límites** | Clinical pathway/de |
| **Estrategia de búsqueda (resultados)** | - Para el protocolo 1:   ('clinical protocol'/exp or (clinical near/5 protocol):ab,ti or 'clinical pathway'/exp or (clinical near/5 pathway):ab,ti or (health near/5 pathway):ab,ti or (care near/5 pathway):ab,ti and ('preoperative period'/exp or (preoperative near/5 period):ab,ti or 'preoperative care'/exp or (preoperative near/5 care):ab,ti or (preoperative near/5 preparation):ab,ti or 'patient transport'/exp or (patient near/5 trasport):ab,ti or (patient near/5 transfer):ab,ti)) and 'clinical pathway'/de   - Para el protocolo 2:   'clinical protocol'/exp or (clinical near/5 protocol):ab,ti or 'clinical pathway'/exp or (clinical near/5 pathway):ab,ti or (health near/5 pathway):ab,ti or (care near/5 pathway):ab,ti and 'postoperative complication'/exp or (postoperative near/5 complicat*):ab,ti or (postsurgical near/5 complicat*):ab,ti or 'patient transport'/exp or (patient near/5 trasport):ab,ti or (patient near/5 transfer):ab,ti and 'clinical pathway'/de   - Para el protocolo 3:   'clinical protocol'/exp or (clinical near/5 protocol):ab,ti or 'clinical pathway'/exp or (clinical near/5 pathway):ab,ti or (health near/5 pathway):ab,ti or (care near/5 pathway):ab,ti and ('postoperative period'/exp or (postoperative near/5 period):ab,ti or 'postoperative care'/exp or (postoperative near/5 care):ab,ti or (postoperative near/5 therapy):ab,ti or (postoperative near/5 treatment):ab,ti or (postoperative near/5 control*):ab,ti) and 'clinical pathway'/de |
| **Núm. de referencias identificadas** | Protocolo 1: 176  Protocolo 2: 330  Protocolo 3: 306 |

| **Reporte de búsqueda núm.11** | |
| --- | --- |
| **Tipo de búsqueda** | Nueva |
| **Motor de búsqueda** | - Google   <https://www.google.com.co/> |
| **Fecha de búsqueda** | 24/08/2014 |
| **Rango de fecha de búsqueda** | - Ninguna |
| **Restricciones de lenguaje** | Ninguna |
| **Otros límites** | Ninguno |
| **Estrategia de búsqueda** | - Para el protocolo 1:   "clinical protocol" OR "clinical pathway" OR "care pathway" OR "health pathway" + "preoperative" OR "patient transport" OR "patient transfer"   - Para el protocolo 2:   "clinical protocol" OR "clinical pathway" OR "care pathway" OR "health pathway" + "postoperative complication" OR "postsurgical complication"   - Para el protocolo 3:   "clinical protocol" OR "clinical pathway" OR "care pathway" OR "health pathway" + "postoperative” |
| **Núm. de páginas de resultados revisadas** | 10 para cada uno de los protocolos |
| **núm. de referencias tras pre-tamización** | Por el equipo |

Resultados disponibles para tamizar siguiendo el siguiente enlace

- Para el protocolo 1:

<https://www.google.com.mx/webhp?sourceid=chrome-instant&ion=1&espv=2&ie=UTF-8#q=%22clinical+protocol%22+OR+%22clinical+pathway%22+OR+%22care+pathway%22+OR+%22health+pathway%22+%2B+%22preoperative%22+OR+%22patient+transport%22+OR+%22patient+transfer%22>+

- Para el protocolo 2:

<https://www.google.com.co/?gfe_rd=cr&ei=h0v6U5e9EYrU8gfyu4H4DA&gws_rd=ssl#q=%22clinical+protocol%22+OR+%22clinical+pathway%22+OR+%22care+pathway%22+OR+%22health+pathway%22+%2B+%22postoperative+complication%22+OR+%22postsurgical+complication%22>

- Para el protocolo 3:

<https://www.google.com.co/?gfe_rd=cr&ei=h0v6U5e9EYrU8gfyu4H4DA&gws_rd=ssl#q=%22clinical+protocol%22+OR+%22clinical+pathway%22+OR+%22care+pathway%22+OR+%22health+pathway%22+%2B+%22postoperative%E2%80%9D++%22>

| **Reporte de búsqueda núm.12** | |
| --- | --- |
| **Tipo de búsqueda** | Nueva |
| **Motor de búsqueda** | - Google Scholar   <http://scholar.google.com.co/> |
| **Fecha de búsqueda** | 24/08/2014 |
| **Rango de fecha de búsqueda** | - Ninguna |
| **Restricciones de lenguaje** | Ninguna |
| **Otros límites** | Ninguno |
| **Estrategia de búsqueda** | - Para el protocolo 1:   "clinical protocol" OR "clinical pathway" OR "care pathway" OR "health pathway" + "preoperative" OR "patient transport" OR "patient transfer"   - Para el protocolo 2:   "clinical protocol" OR "clinical pathway" OR "care pathway" OR "health pathway" + "postoperative complication" OR "postsurgical complication"   - Para el protocolo 3:   "clinical protocol" OR "clinical pathway" OR "care pathway" OR "health pathway" + "postoperative” |
| **Núm. de páginas de resultados revisadas** | 10 |
| **Núm. de referencias tras pre-tamización** | Por el equipo |

Resultados disponibles siguiendo el siguiente enlace:

- Para el protocolo 1

<http://scholar.google.com.co/scholar?hl=es&q=%22clinical+protocol%22+OR+%22clinical+pathway%22+OR+%22care+pathway%22+OR+%22health+pathway%22+%2B+%22preoperative%22+OR+%22patient+transport%22+OR+%22patient+transfer%22&btnG=&lr>=

- Para el protocolo 2

<http://scholar.google.com.co/scholar?hl=es&as_sdt=0,5&q=%22clinical+protocol%22+OR+%22clinical+pathway%22+OR+%22care+pathway%22+OR+%22health+pathway%22+%2B+%22postoperative+complication%22+OR+%22post+surgical+complication%22>

- Para el protocolo 3

<http://scholar.google.com.co/scholar?q=%22clinical+protocol%22+OR+%22clinical+pathway%22+OR+%22care+pathway%22+OR+%22health+pathway%22+%2B+%22postoperative%E2%80%9D&btnG=&hl=es&as_sdt=0%2C5>
