# Supplementary material
Source: Elsevier journal article supplement (https://www.sciencedirect.com/science/article/pii/S0120334714001464)
Supplement: mmc2 [file S0120334714001464:mmc2.xlsx]

## Sheet: AGREE
Calculadora AGREE II
						*hidden calculations columns
Total # of Appraisers	Evaluador						Dominio Score for	Appraiser(s):
2	1	2	3	4		Dominio	Max Score	Min Score	Appraisers per Dominio
											DATA AUDIT
Dominio 1 - ALCANCE Y OBJETIVO						1	42	6	2
Item 1. El(los) objetivo(s) general(es) de la guía está(n) específicamente descrito(s).	7	7			14	2	42	6	2		# of Dominios with SD that are >=1.5 and <2 SD (OS: Outlying Score, first level severity)		0
Item 2. El(los) aspecto(s) de salud cubierto(s) por la guía está(n) específicamente descrito(s).	7	7			14	3	112	16	2
Item 3. La población (pacientes, público, etc) a la cual se pretende aplicar la guía está específicamente descrita	7	7			14	4	42	6	2		# of Dominios with SD that are >=2 SD (OS2: Outlying Score, 2nd level severity)		0
	21	21	Caution: Empty Cells	Caution: Empty Cells	42	5	56	8	2
				Dominio 1 Score for 2 Appraiser(s):	1	6	28	4	2		Decision Rule: Of Dominios 1-5 and the Overall Assessment OS >=3 or OS2 >=1
Dominio 2 - PARTICIPACIÓN DE LOS IMPLICADOS O GRUPOS DE INTERES
Item 4. El grupo que desarrolla la guía incluye individuos de todos los grupos profesionales relevantes.	7	7			14
Item 5. Se han tenido en cuenta los puntos de vista y preferencias de la población diana (pacientes, público, etc.).	7	7			14
Item 6. Los usuarios diana de la guía están claramente definidos.	7	7			14						No action required
	21	21	Caution: Empty Cells	Caution: Empty Cells	42
				Dominio 2 Score for 2 Appraiser(s):	1
											Average Standard Deviation of Items by Dominio
Dominio 3 - RIGOR EN LA ELABORACIÓN
Item 7. Se han utilizado métodos sistemáticos para la búsqueda de la evidencia.	7	6			13						Dominio	Standard Deviation	Discrepancy Level
Item 8. Los criterios para seleccionar la evidencia se describen con claridad.	6	6			12						1	0	LOW
Item 9. Las fortalezas y limitaciones del conjunto de la evidencia están claramente descritas.	6	6			12						2	0	LOW
Item 10. Los métodos utilizados para formular las recomendaciones están claramente descritos.	6	6			12						3	0.353553	LOW
Item 11. Al formular las recomendaciones han sido considerados los beneficios en salud, los efectos secundarios y los riesgos.	7	6			13						4	0	LOW
Item 12. Hay una relación explícita entre cada una de las recomendaciones y las evidencias en las que se basan.	7	6			13						5	0	LOW
Item 13. La guía ha sido revisada por expertos externos antes de su publicación.	6	6			12						Overall Guideline Assessment	0	LOW
Item 14. Se incluye un procedimiento para actualizar la guía.	7	6			13
	52	48	Caution: Empty Cells	Caution: Empty Cells	100
				Dominio 3 Score for 2 Appraiser(s):	0.875
Dominio 4 - CLARIDAD DE PRESENTACIÓN
Item 15. Las recomendaciones son específicas y no son ambiguas.	7	7			14
Item 16. Las distintas opciones para el manejo de la enfermedad o condición de salud se presentan claramente.	7	7			14
Item 17. Las recomendaciones clave son fácilmente identificables.	7	7			14
	21	21	Caution: Empty Cells	Caution: Empty Cells	42
				Dominio 4 Score for 2 Appraiser(s):	1
Dominio 5 - APLICABILIDAD
Item 18. La guía describe factores facilitadores y barreras para su aplicación.	7	7			14
Item 19. La guía proporciona consejo y/o herramientas sobre cómo las recomendaciones pueden ser llevadas a la práctica.	7	7			14
Item 20. Se han considerado las posibles implicaciones de la aplicación de las recomendaciones, sobre los recursos.	7	7			14
Item 21. La guía ofrece criterios para monitorización y/o auditoria.	7	7			14
	28	28	Caution: Empty Cells	Caution: Empty Cells	56
				Dominio 5 Score for 2 Appraiser(s):	1
Dominio 6 - INDEPENDENCIA EDITORIAL
Item 22. Los puntos de vista de la entidad financiadora no han influenciado el contenido de la guía.	7	7			14
Item 23. Se han registrado y abordado los conflictos de intereses de los miembros del grupo elaborador de la guía.	7	7			14
	14	14	Caution: Empty Cells	Caution: Empty Cells	28
				Dominio 6 Score for 2 Appraiser(s):	1
EVALUACIÓN GLOBAL DE LA GUÍA
Puntúe la calidad global de la guía.	6	6
Recomendaría esta guía para su uso.	Sí, con modificaciones	Sí, con modificaciones
